# Supplementary material for: Unsupervised classification of simulated magnetospheric regions
Source: Copernicus journal article supplement (doi:10.5194/angeo-2021-33), 2021-06-03
Supplement: Supplementary file [file angeo-2021-33-AC2-supplement.pdf]

**Table 3.** Percentage of data points classified in the same cluster as F1, for the different feature sets (second column, header “S”). In the third column, header “M”, the two magnetosheath clusters just downstream the bow shock, 1 and 4, are considered one. The dataset used is the validation dataset, at time  $t_0 + 210$  minutes.

| Case  | S     | M     |
|-------|-------|-------|
| F1-TV | 80.71 | 85.72 |
| F1-NL | 59.83 | 61.47 |
| F2    | 84.69 | 84.71 |
| F3    | 87.85 | 89.01 |
| F4    | 82.70 | 83.01 |
| F5    | 93.07 | 94.42 |
| F6    | 91.02 | 92.36 |
| F7    | 83.38 | 84.77 |
| F8    | 91.55 | 91.78 |
| F9    | 66.05 | 75.67 |
| F10   | 92.49 | 93.90 |
